# Supplementary material for: Synthesis, Single Crystal Structural Investigation, Hirshfeld Surface Analysis, Thermoanalysis and Spectroscopic Study of Two New Cu(II) and Co(II) Transition-Metal Complexes
Source: MDPI journal article supplement (doi:10.3390/cryst11080986), 2021-08-19
Supplement: s1 [file s1]

**Synthesis, single crystal structural investigation, Hirshfeld surface analysis,  
thermoanalysis and spectroscopic study of two new Cu(II) and Co(II)  
transition-metal complexes**

Rim Boubakri<sup>a</sup>, Mirosław Szybowicz<sup>b</sup>, Mariola Sadej<sup>c</sup>, Sarra Soudani<sup>a</sup>, Frédéric Lefebvre<sup>d</sup>,  
Valeria Ferretti<sup>e</sup>, Cherif Ben Nasr<sup>a</sup>, Kamel Kaabi<sup>a,\*</sup>

<sup>a</sup>Laboratoire de Chimie des Matériaux, Université de Carthage, Faculté des Sciences de Bizerte, 7021, Zarzouna, Tunisia

<sup>b</sup>Faculty of Materials Engineering and Technical Physics Instytut Badań Materiałowych i Inżynierii Kwantowej / Institute of Materials Research and Quantum Engineering Piotrowo 3, 60-965 Poznań, Poland

<sup>c</sup>Faculty of Chemical Technology, Poznan University of Technology, Berdychowo 4, 60-965 Poznan, Poland

<sup>d</sup>Laboratoire de Chimie Organométallique de Surface (LCOMS), Ecole Supérieure de Chimie Physique Electronique, 69626 Villeurbanne Cedex, France.

<sup>e</sup>Department of Chemical and Pharmaceutical Sciences and Center for Structural Diffraction, via Fossato di Mortara 17, I-44121 Ferrara, Italy

\*Corresponding e-mail: [kamel\\_kaabi@yahoo.fr](mailto:kamel_kaabi@yahoo.fr)

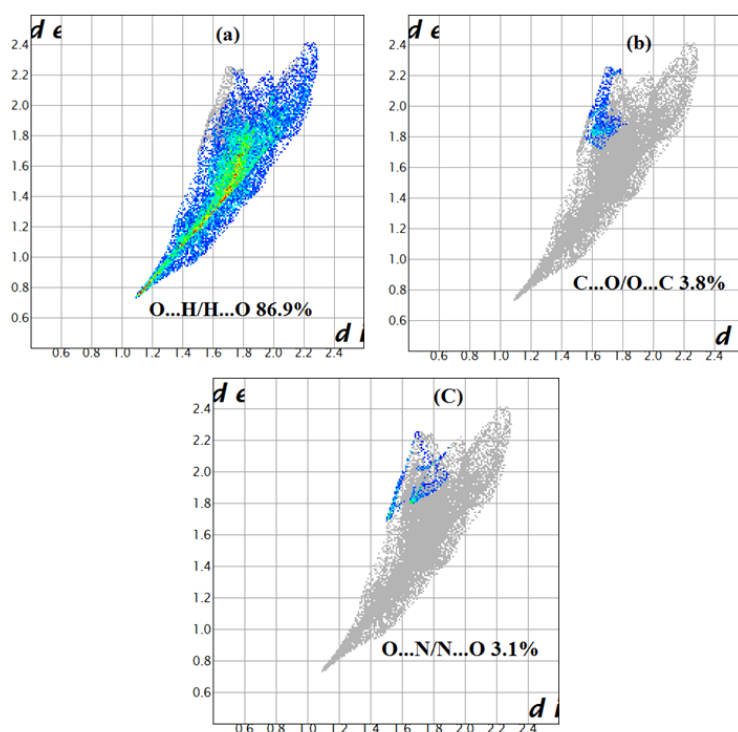

**Figure S1.** Decomposed fingerprint plots of the major contacts around the nitrate group of compound (**1**).

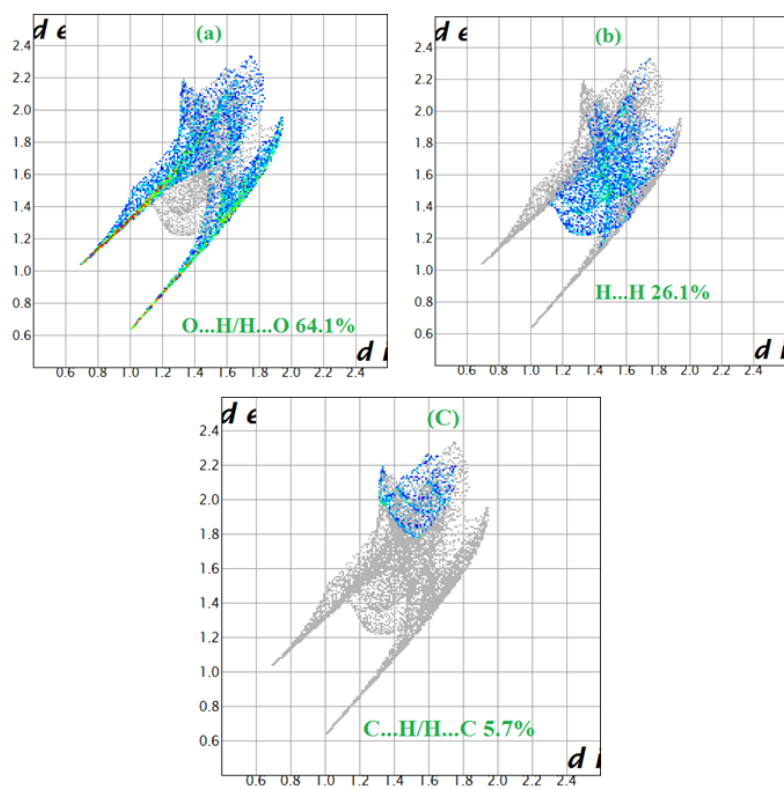

**Figure S2.** Decomposed fingerprint plots of the major contacts around the water molecule of compound (1).

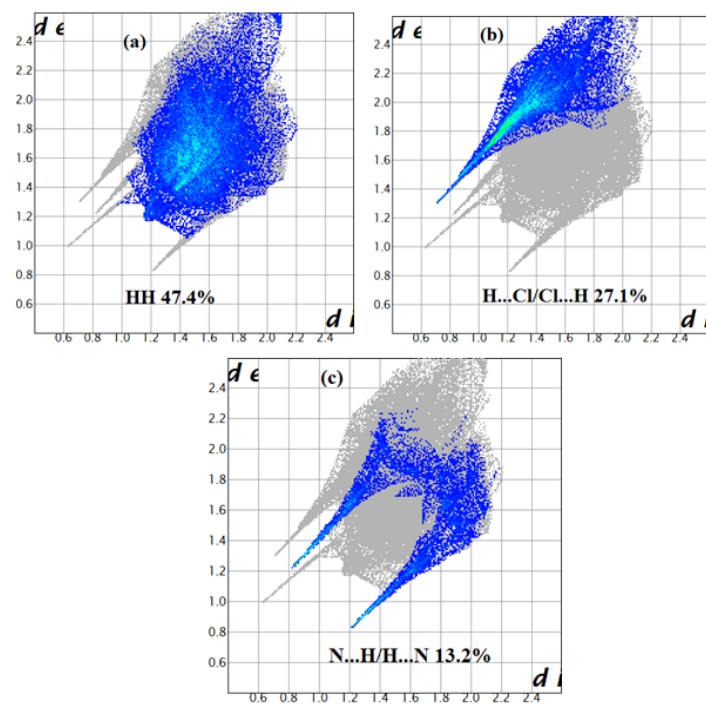

**Figure S3.** Decomposed fingerprint plots of the major contacts around organic cations of compound **(2)**.

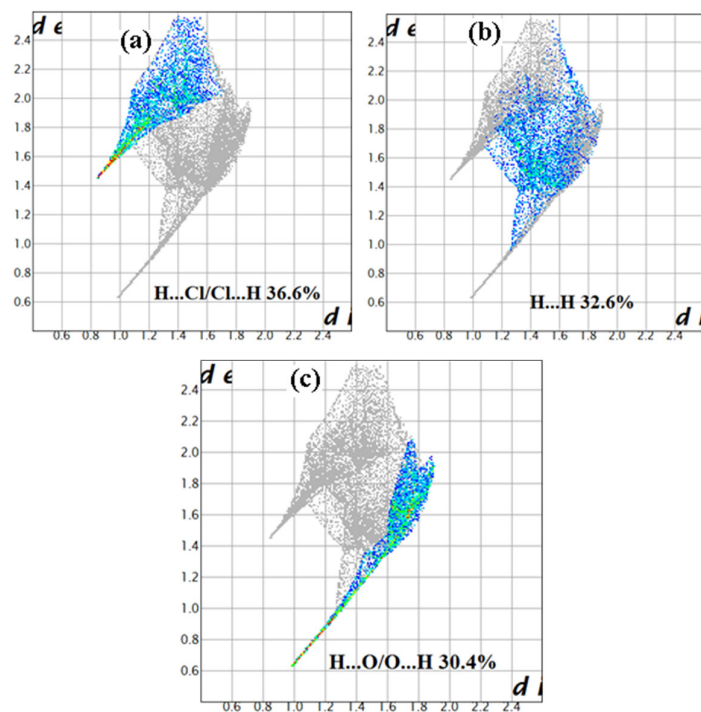

**Figure S4.** Decomposed fingerprint plots of the major contacts around the water molecule of compound (2).

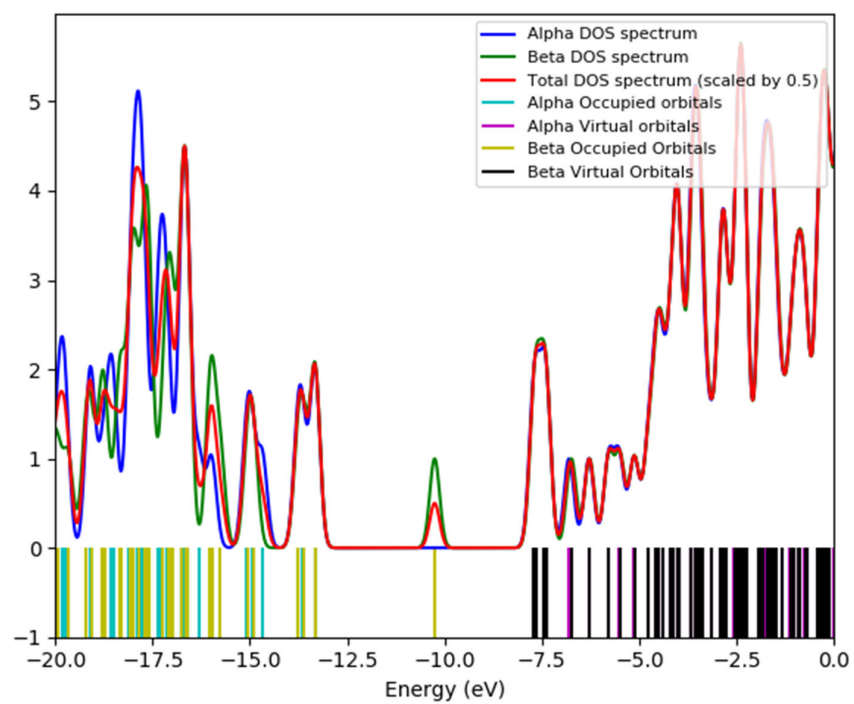

**Figure S5.** Energy distribution of the different orbitals of **1**.

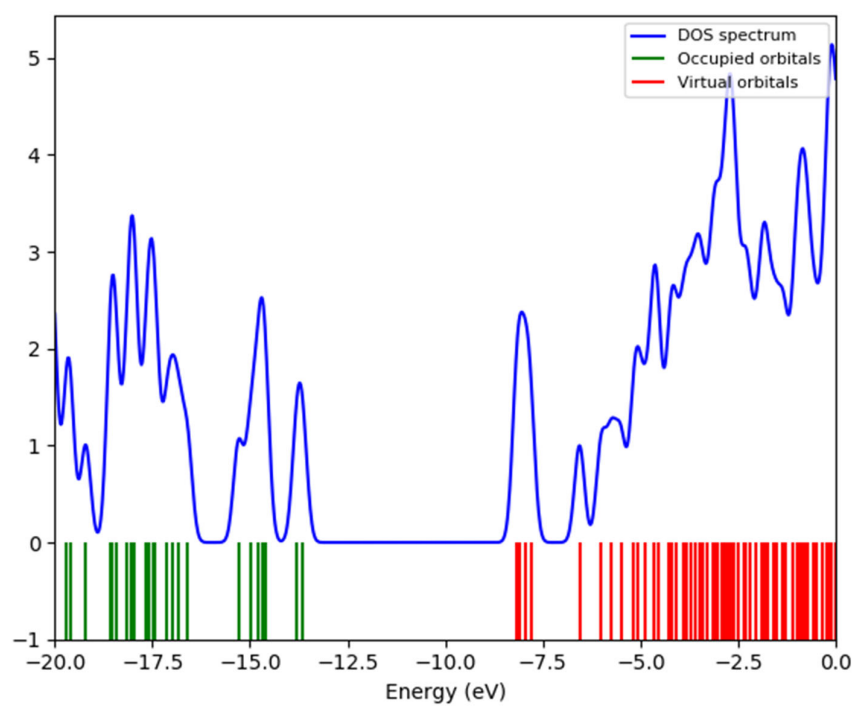

**Figure S6.** Energy distribution of the different orbitals of the two organic cations in (2).

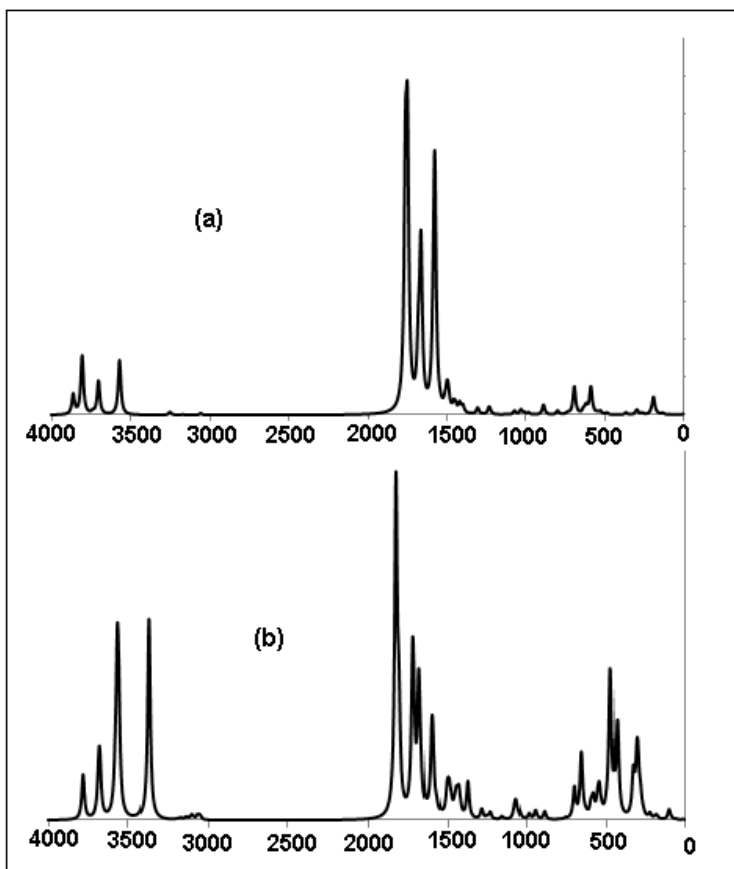

Figure S7. Calculated infrared absorption spectrum of (1) and (2).

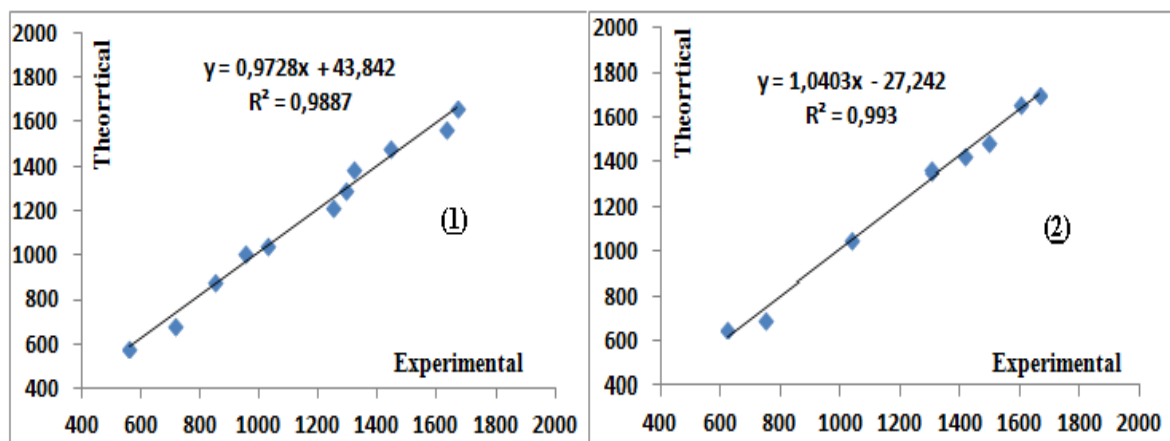

Figure S8. Comparison between experimental and calculated IR frequencies of (1) and (2).

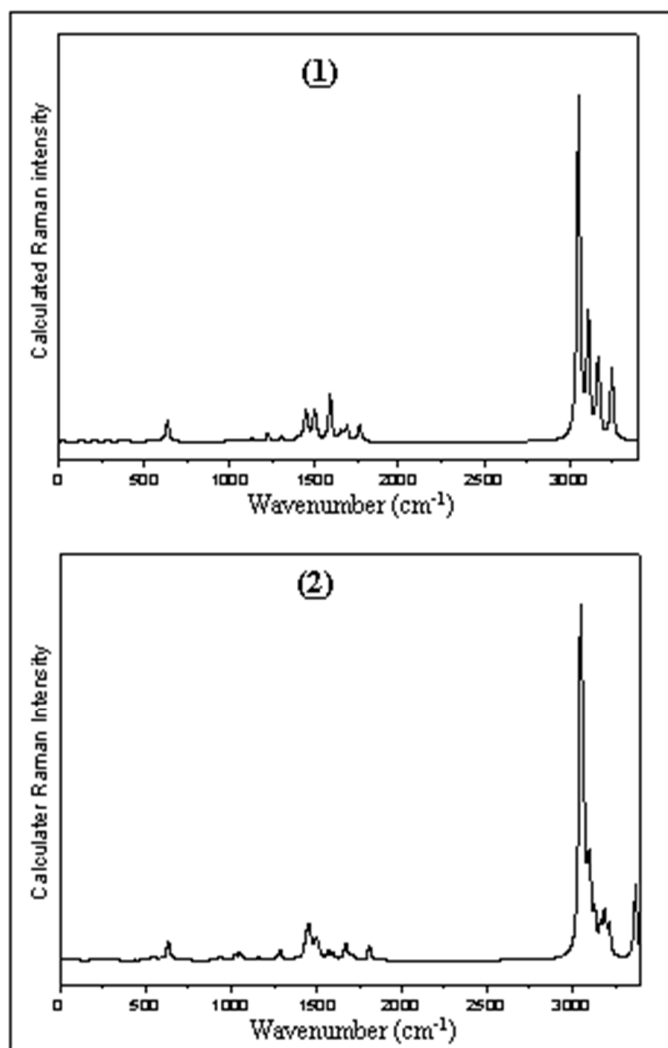

**Figure S9.** Theoretical Raman spectrum of **(1)** and **(2)**.



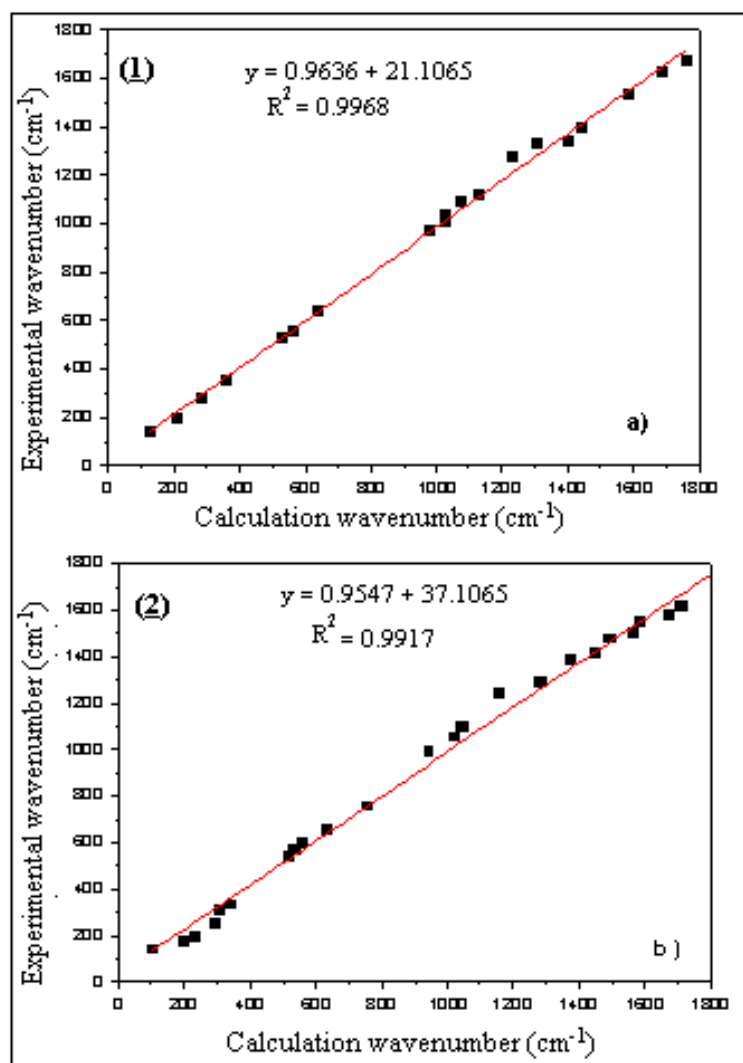

**Figure S10.** Comparison between experimental and calculated Raman frequencies of (1) and (2)
